# Supplementary material for: Nonmetallic boron nitride embedded graphitic carbon catalyst for oxidative dehydrogenation of ethylbenzene
Source: Royal Society of Chemistry journal article supplement (doi:10.1039/c9cy02342a), 2020-01-01
Supplement: c9cy02342a1.pdf [file c9cy02342a1.pdf]

## Supporting Information

# Nonmetallic BN Embedded Graphitic Carbon Catalyst for Oxidative Dehydrogenation of Ethylbenzene

Jian Sheng, Bing Yan, Bin He, Wen-Duo Lu, Wen-Cui Li, An-Hui Lu\*

State Key Laboratory of Fine Chemicals, School of Chemical Engineering, Dalian University of Technology, Dalian 116024, P. R. China

E-mail: anhuilu@dlut.edu.cn, Tel/Fax: +86-411-84986112

**Table S1** Results of blank experiment over quartz sand in ODH reaction.

| Temperature (°C) | EB Conv. (%) | ST Select. (%) | CO <sub>x</sub> Select. (%) |
|------------------|--------------|----------------|-----------------------------|
| 356              | 0            | -              | -                           |
| 377              | 0.2          | 100            | 0                           |
| 397              | 0.3          | 100            | 0                           |
| 418              | 0.5          | 100            | 0                           |
| 438              | 0.7          | 100            | 0                           |
| 458              | 1.1          | 100            | 0                           |

Reaction condition: quartz sand, 200 mg, EB=2.8%, O<sub>2</sub>/EB=1, N<sub>2</sub> as balance.

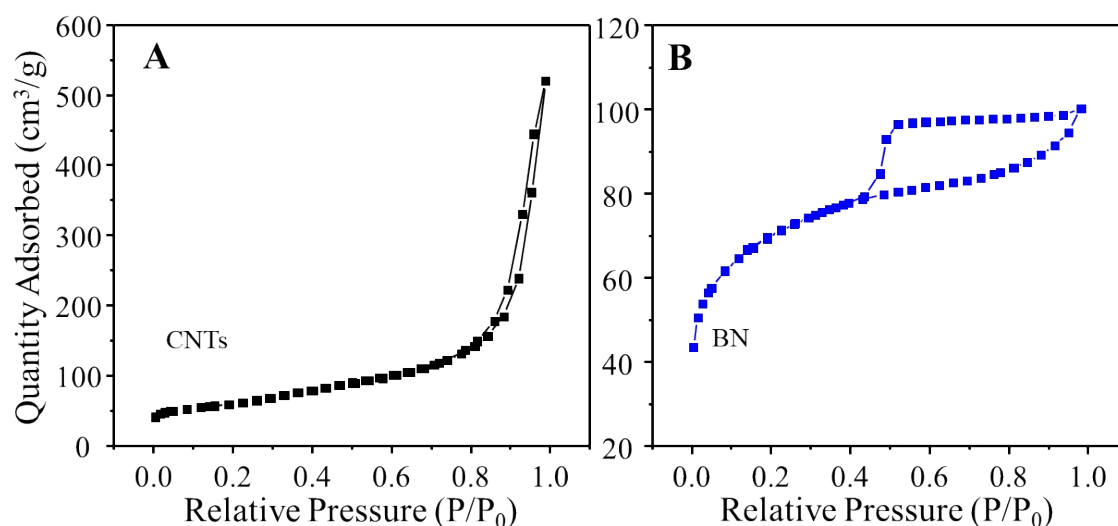

**Figure S1** N<sub>2</sub> sorption isotherms of CNTs and BN.

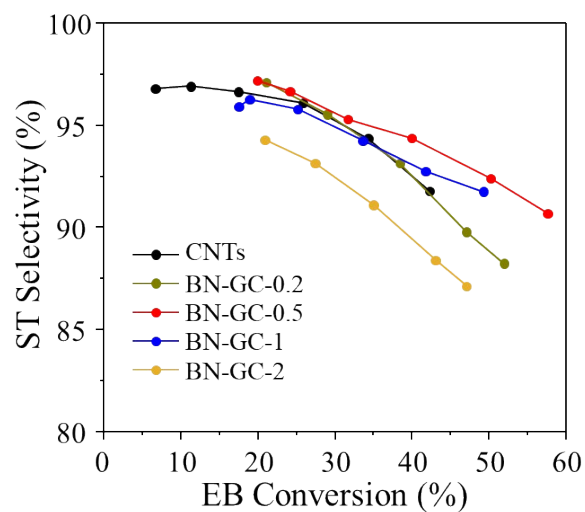

**Figure S2** Conversion-selectivity profiles of BN-GC catalysts with different B content. Reaction condition: 50 mg, EB=2.8%,  $O_2/EB=1$ ,  $N_2$  as balance.

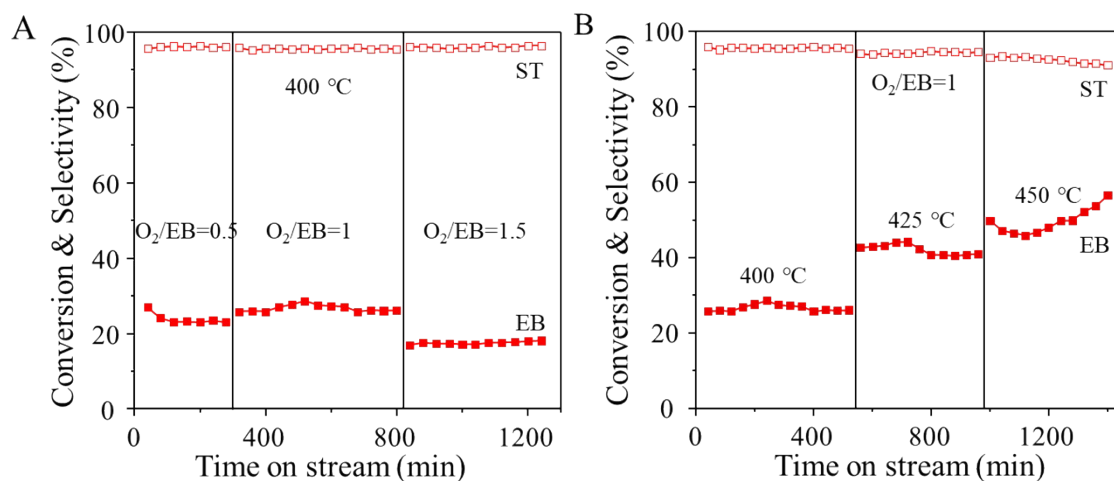

**Figure S3** Optimization of the reaction conditions under different ratio of  $O_2/EB$  and temperature. Reaction condition: 50 mg, EB=2.8%,  $N_2$  as balance.

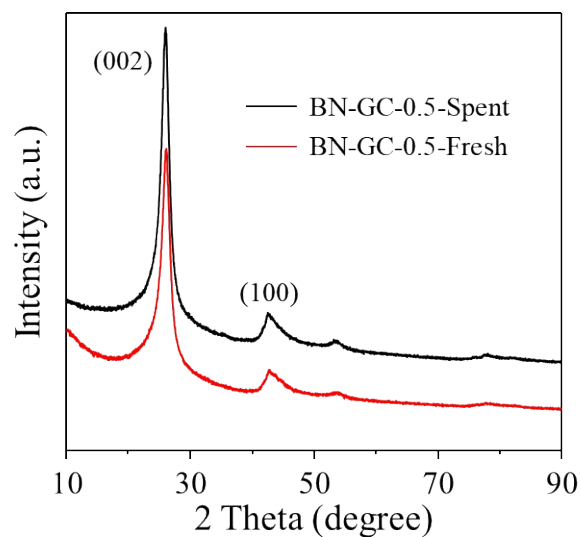

**Figure S4** XRD patterns of fresh and spent BN-GC-0.5.

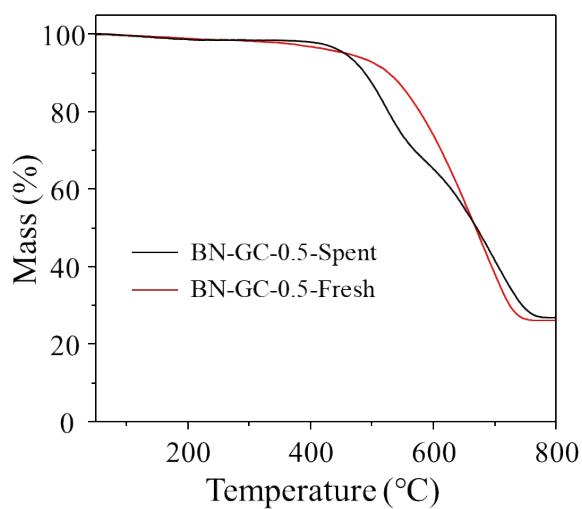

**Figure S5** Thermogravimetry analysis of fresh and spent BN-GC-0.5.

**Table S2.** Chemical properties and deconvolution of O 1s for fresh and spent BN-GC-0.5, CNTs catalysts.

| Catalysts       | Element (at%) |      |     |     | O groups/Oxygen (%) |      |       |      | Total O <sub>groups</sub> (%) |      |
|-----------------|---------------|------|-----|-----|---------------------|------|-------|------|-------------------------------|------|
|                 | B             | C    | N   | O   | C=O                 | B-O  | O=C-O | C-O  | C=O                           | B-O  |
| BN-GC-0.5-Fresh | 10.0          | 72.8 | 9.9 | 7.0 | 17.7                | 27.3 | 37.4  | 17.6 | 1.24                          | 1.91 |
| BN-GC-0.5-Spent | 9.4           | 72.4 | 8.6 | 9.3 | 17.8                | 29.0 | 18.1  | 35.0 | 1.66                          | 2.70 |
| CNTs-Fresh      | -             | 97.9 | -   | 1.9 | 10.8                | -    | 50.7  | 38.4 | 0.21                          | -    |
| CNTs-Spent      | -             | 97.8 | -   | 2.0 | 16.8                | -    | 37.2  | 46.0 | 0.34                          | -    |

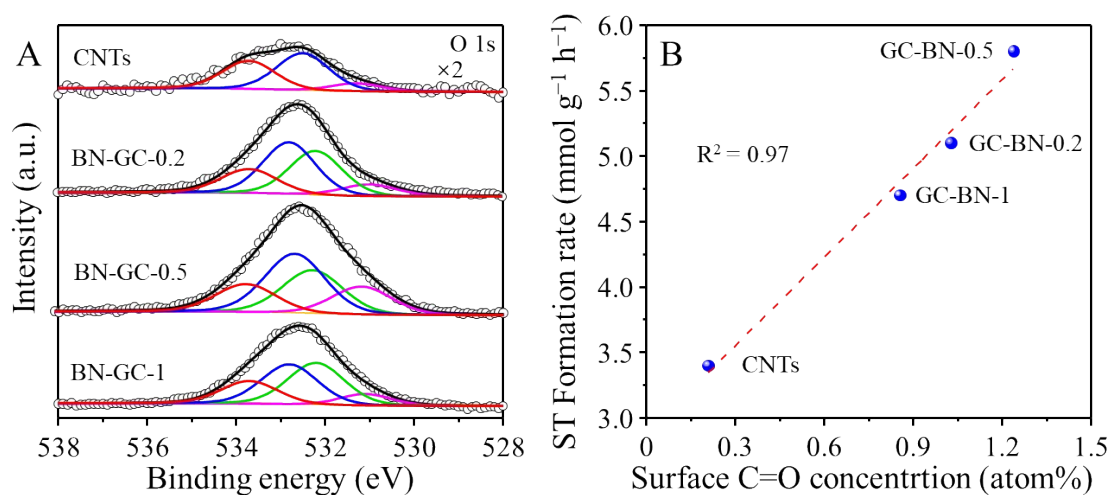

**Figure S6** (A) Deconvolution of O 1s and (B) plot for the concentration of C=O against the ST formation rates.

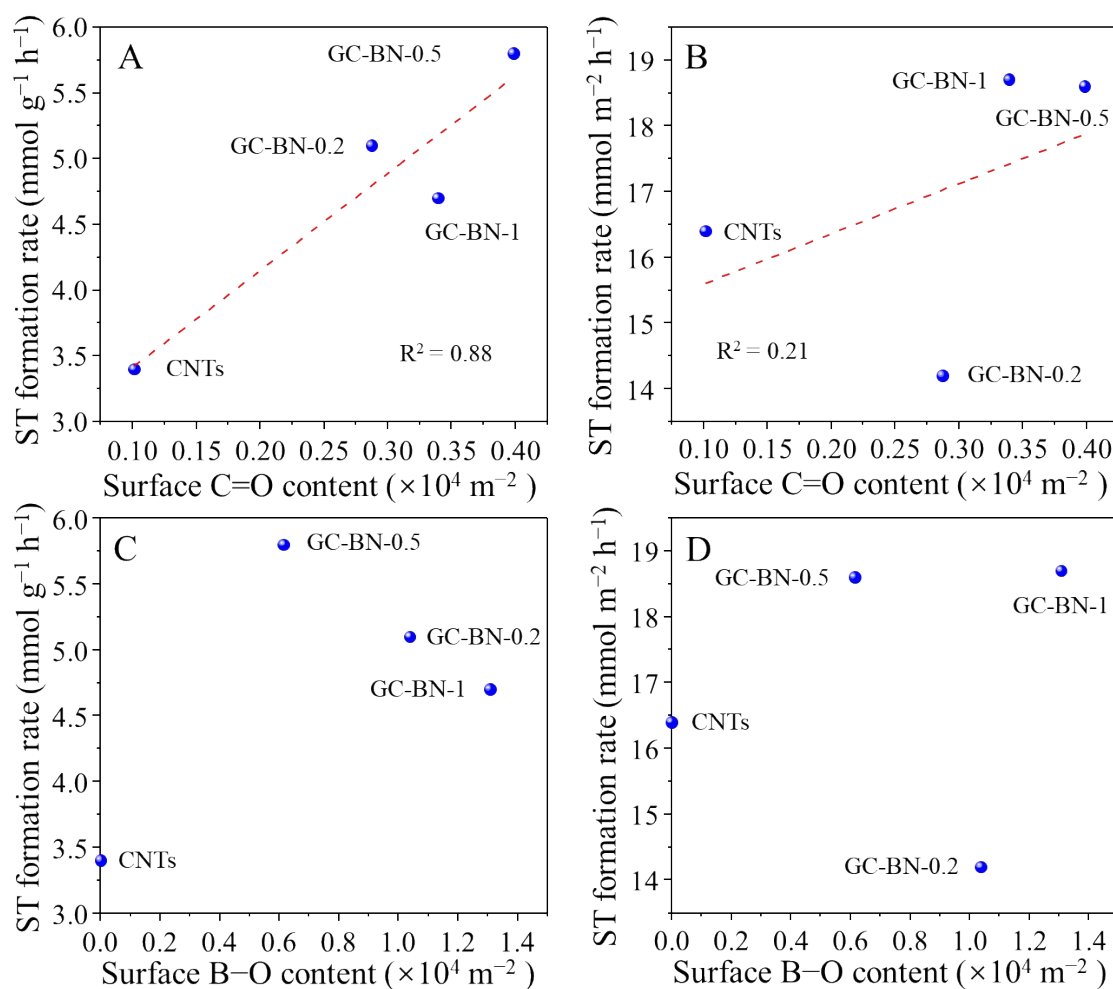

**Figure S7** Correlation of the reaction rate (based on mass and surface area) against the amount of C=O and B-O groups per surface area.

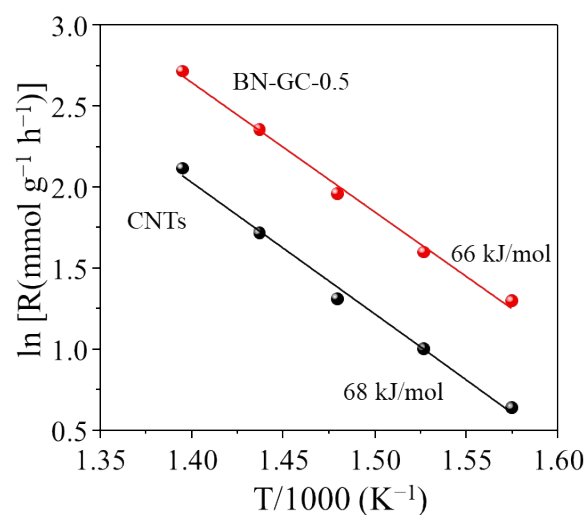

**Figure S8** Activation energy of BN-GC-0.5 and CNTs. Reaction condition: 360-440 °C, 50 mg, EB=2.8%, O<sub>2</sub>/EB=1, N<sub>2</sub> as balance. Keep EB conversion below 10% by adjusting space velocity.

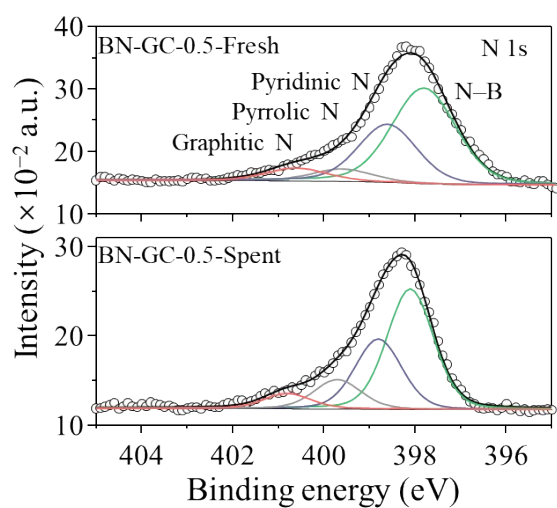

**Figure S9** Deconvolution of N 1s spectra of fresh and spent BN-GC-0.5.

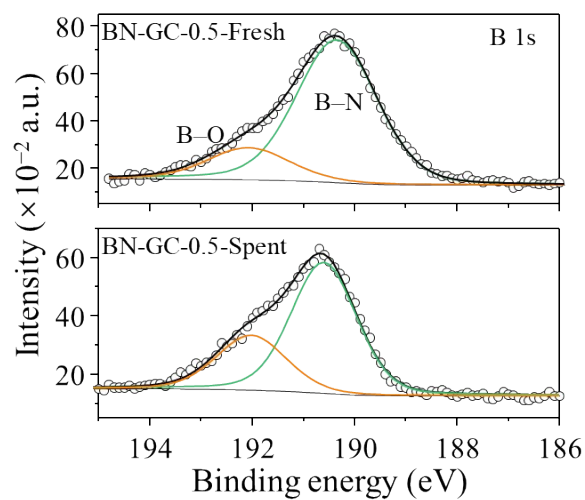

**Figure S10** Deconvolution of B 1s spectra of fresh and spent BN-GC-0.5.

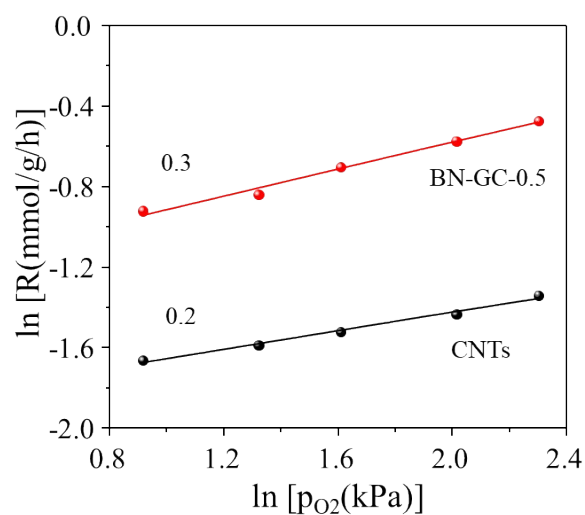

**Figure S11** Reaction order of  $O_2$  over BN-GC-0.5 and CNTs. Reaction condition: 400 °C, 50 mg, EB=2.8%,  $N_2$  as balance. Keep EB conversion below 10% by adjusting space velocity.
